# Supplementary material
Source: MDPI journal article supplement (https://www.mdpi.com/1999-4907/11/8/862)
Supplement: s1 [file s1]

## Sheet: d13C predictor variables
Variable	Years used to create monthly mean grids	Grid resolution	Source
Rainfall	1998 - 2016	0.25 degrees	[Dataset] TRMM imagery provided by NASA Goddard Earth Sciences DISC, based on data from NASA and the Japanese Space Agency (JAXA). https://neo.sci.gsfc.nasa.gov/view.php?datasetId=TRMM_3B43M&date=2016-08-01 (accessed on 11th April 2018).
Precipitation	1989 - 2009	0.5 degrees	[Dataset] CRU TS 3.1 Harris et al., [2014] (accessed on 11th April 2018).
Vapour pressure	1989 - 2009	0.5 degrees	[Dataset] CRU TS 3.1 Harris et al., [2014] (accessed on 11th April 2018).
Water Vapour	2002 - 2018	0.1 degrees	[Dataset] Aqua/MODIS Imagery by Reto Stockli, NASA's Earth Observatory, using data provided by the MODIS Atmosphere Science Team, NASA Goddard Space Flight Center. https://neo.sci.gsfc.nasa.gov/view.php?datasetId=MYDAL2_M_SKY_WV&date=2018-04-01
Outgoing Longwave Radiation (OLWR)	2006 - 2018	0.25 degrees	[Dataset] Jesse Allen, NASA Earth Observatory, based on FLASHFlux data. FLASHFlux data are produced using CERES observations convolved with MODIS measurements from both the Terra and Aqua satellite. Data provided by the FLASHFlux team, NASA Langley Research Center. https://neo.sci.gsfc.nasa.gov/view.php?datasetId=CERES_LWFLUX_M&date=2018-04-01 (accessed on 11th April 2018).
Tropospheric CO2	2010 - 2016	2 x 2.5 degrees	[Dataset] Olsen, E.T. AIRS Science Team/Joao Texeira(2008), AIRS/Aqua L3 Monthly CO2 in the free troposphere (AIRS-only) 2.5 degrees x 2 degrees V005, Greenbelt, MD, USA, Goddard Earth Sciences Data and Information Services Center (GES DISC), Accessed [01.06.2018] 10.5067/Aqua/AIRS/DATA336
Tropospheric Ozone	2004 - 2018	0.25 degrees	[Dataset] Jesse Allen, NASA's Earth Observatory, using data provided by the OMI instrument team. https://neo.sci.gsfc.nasa.gov/view.php?datasetId=AURA_OZONE_M&date=2018-05-01 (accessed on 11th April 2018).
			Pawan K. Bhartia(2012), OMI/Aura TOMS-Like Ozone and Radiative Cloud Fraction L3 1 day 0.25 degree x 0.25 degree V3, NASA Goddard Space Flight Center, Goddard Earth Sciences Data and Information Services Center (GES DISC), Accessed [01.06.2018] 10.5067/Aura/OMI/DATA3002
Sulfur dioxide	1980 - 2017	0.5 x 0.625 degrees	[Dataset] Global Modeling and Assimilation Office (GMAO)(2015), MERRA-2 tavgM_2d_aer_Nx: 2d,Monthly mean,Time-averaged,Single-Level,Assimilation,Aerosol Diagnostics V5.12.4, Greenbelt, MD, USA, Goddard Earth Sciences Data and Information Services Center (GES DISC), Accessed [01.06.2018] 10.5067/FH9A0MLJPC7N
Tropospheric Nitrogen Dioxide	2004 - 2018	0.1 degrees	[Dataset] Kevin Ward, AURA, Science Systems and Applications, Inc. / NASA Goddard Space Flight Center https://neo.sci.gsfc.nasa.gov/view.php?datasetId=AURA_NO2_M&date=2018-01-01 (accessed on 11th April 2018).
Tropospheric Carbon Monoxide	2000 - 2017	0.25 degrees	[Dataset] Jesse Allen, NASA Earth Observatory, MOPITT, https://neo.sci.gsfc.nasa.gov/view.php?datasetId=MOP_CO_M&date=2017-02-01 (accessed on 11th April 2018).

## Sheet: d34S predictor variables
Variable	Years used	Grid resolution	Source
Rainfall	1998 - 2016	0.25 degrees	[Dataset] TRMM imagery provided by NASA Goddard Earth Sciences DISC, based on data from NASA and the Japanese Space Agency (JAXA). https://neo.sci.gsfc.nasa.gov/view.php?datasetId=TRMM_3B43M&date=2016-08-01 (accessed on 11th April 2018).
Precipitation	1989 -2009	0.5 degrees	[Dataset] CRU TS 3.1 Harris et al., [2014] (accessed on 11th April 2018).
Vapour pressure	1998 - 2012	0.5 degrees	[Dataset] CRU TS 3.1 Harris et al., [2014]
Water Vapour	2002 - 2018	0.1 degrees	[Dataset] Aqua/MODIS Imagery by Reto Stockli, NASA's Earth Observatory, using data provided by the MODIS Atmosphere Science Team, NASA Goddard Space Flight Center. https://neo.sci.gsfc.nasa.gov/view.php?datasetId=MYDAL2_M_SKY_WV&date=2018-04-01 (accessed on 11th April 2018).
Cloud Water Content	2002 - 2018	0.1 degrees	[Dataset] Imagery by Reto Stockli, NASA's Earth Observatory, using data provided by the MODIS Atmosphere Science Team, NASA Goddard Space Flight Center. https://neo.sci.gsfc.nasa.gov/view.php?datasetId=MYDAL2_M_CLD_WP&date=2018-04-01 (accessed on 11th April 2018).
Plant Canopy Surface Water	1979 – 2018	0.125 degrees	[Dataset] David Mocko, NASA/GSFC/HSL(2012), NLDAS Noah Land Surface Model L4 Monthly 0.125 x 0.125 degree V002, Greenbelt, Maryland, USA, Goddard Earth Sciences Data and Information Services Center (GES DISC), Accessed [01.06.2018] 10.5067/NOXZSD0Z6JGD (accessed on 1 Jun 2018)
Tropospheric Nitrogen Dioxide	2004 - 2018	0.1 degrees	[Dataset] Kevin Ward, AURA, Science Systems and Applications, Inc. / NASA Goddard Space Flight Center https://neo.sci.gsfc.nasa.gov/view.php?datasetId=AURA_NO2_M&date=2018-01-01 (accessed on 11th April 2018).
SO2	1980 - 2017	0.5 x 0.625 degrees	[Dataset] Global Modeling and Assimilation Office (GMAO)(2015), MERRA-2 tavgM_2d_aer_Nx: 2d,Monthly mean,Time-averaged,Single-Level,Assimilation,Aerosol Diagnostics V5.12.4, Greenbelt, MD, USA, Goddard Earth Sciences Data and Information Services Center (GES DISC), Accessed [01.06.2018] 10.5067/FH9A0MLJPC7N
SO4	1980 - 2017	0.5 x 0.625 degrees	[Dataset] Global Modeling and Assimilation Office (GMAO)(2015), MERRA-2 tavgM_2d_aer_Nx: 2d,Monthly mean,Time-averaged,Single-Level,Assimilation,Aerosol Diagnostics V5.12.4, Greenbelt, MD, USA, Goddard Earth Sciences Data and Information Services Center (GES DISC), Accessed [01.06.2018] 10.5067/FH9A0MLJPC7N
Reflected Short Wave Radiation	2006 - 2018	0.25 degrees	[Dataset] Imagery by Jesse Allen, NASA Earth Observatory, based on FLASHFlux data. FLASHFlux data are produced using CERES observations convolved with MODIS measurements from both the Terra and Aqua satellite. Data provided by the FLASHFlux team, NASA Langley Research Center. https://neo.sci.gsfc.nasa.gov/view.php?datasetId=CERES_SWFLUX_M&date=2018-04-01 (accessed on 11th April 2018).
